# Supplementary material for: Isolation and Identification of Herbicidal Active Compounds from Brassica oleracea L. and Exploration of the Binding Sites of Brassicanate A Sulfoxide
Source: MDPI journal article supplement (doi:10.3390/plants12132576), 2023-07-07
Supplement: s1 [file s1]

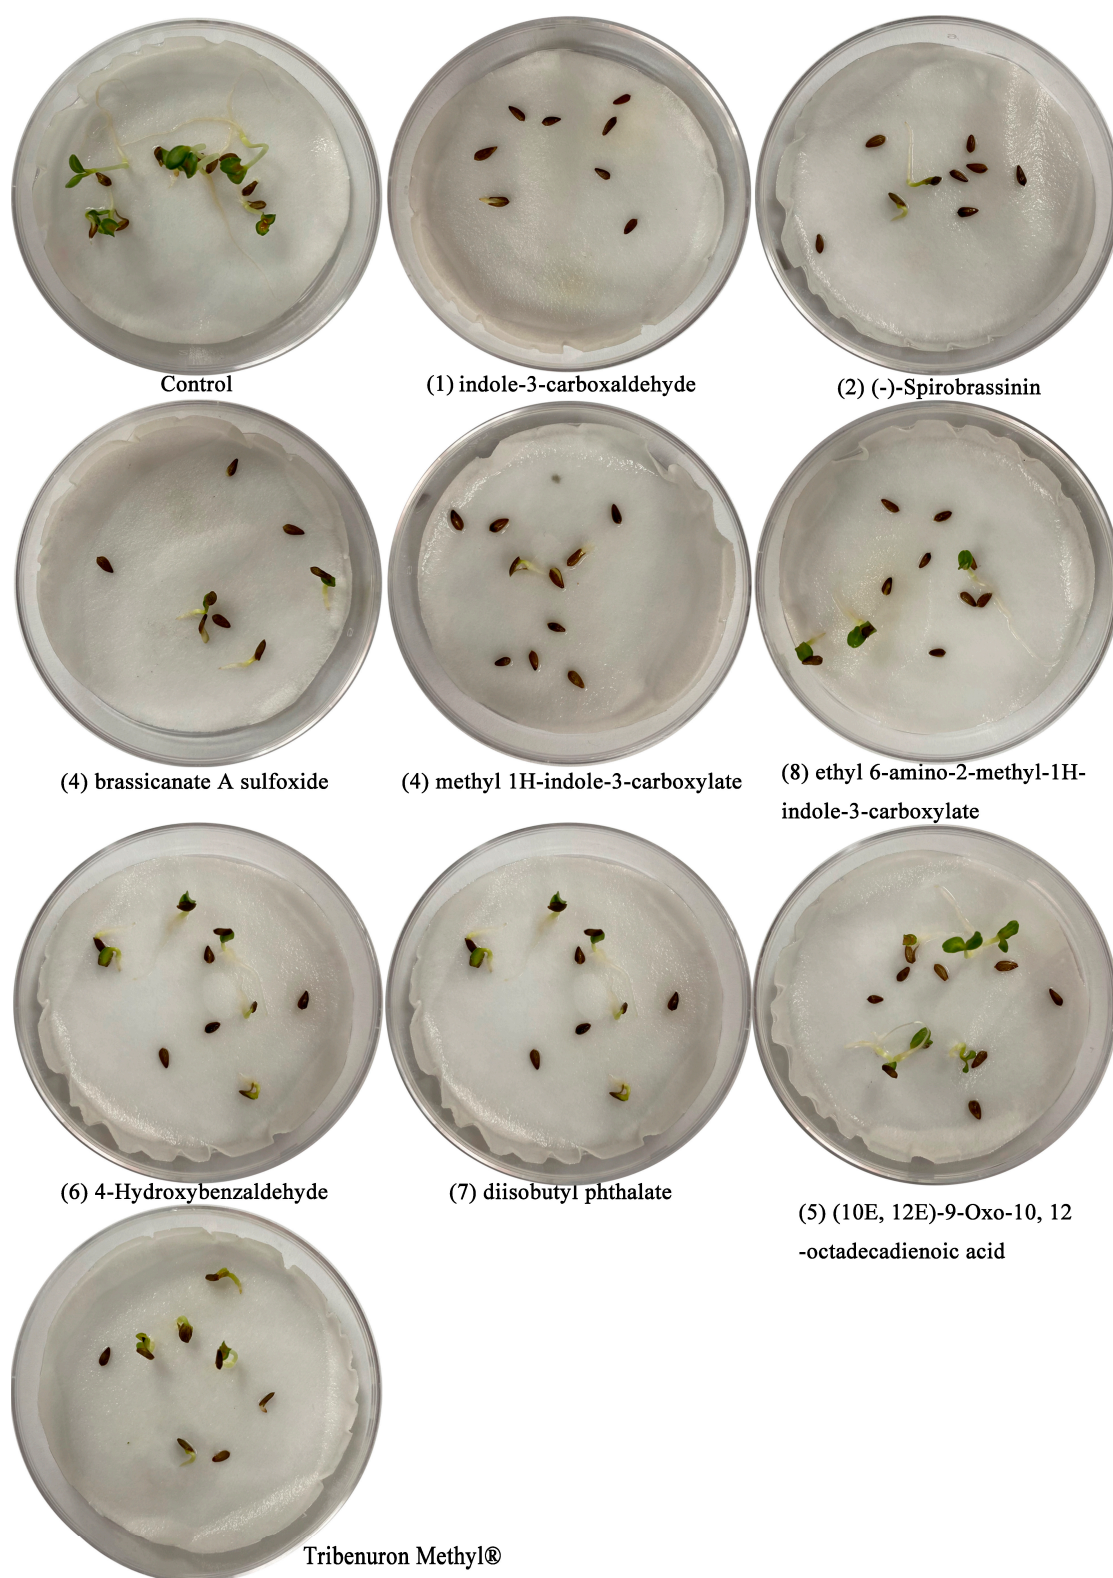

**Figure S1.** The effects of compounds from *B. oleracea* L. (1-8) and Tribenuron Methyl® on *L. sativa* Linn. germination and seedling growth.

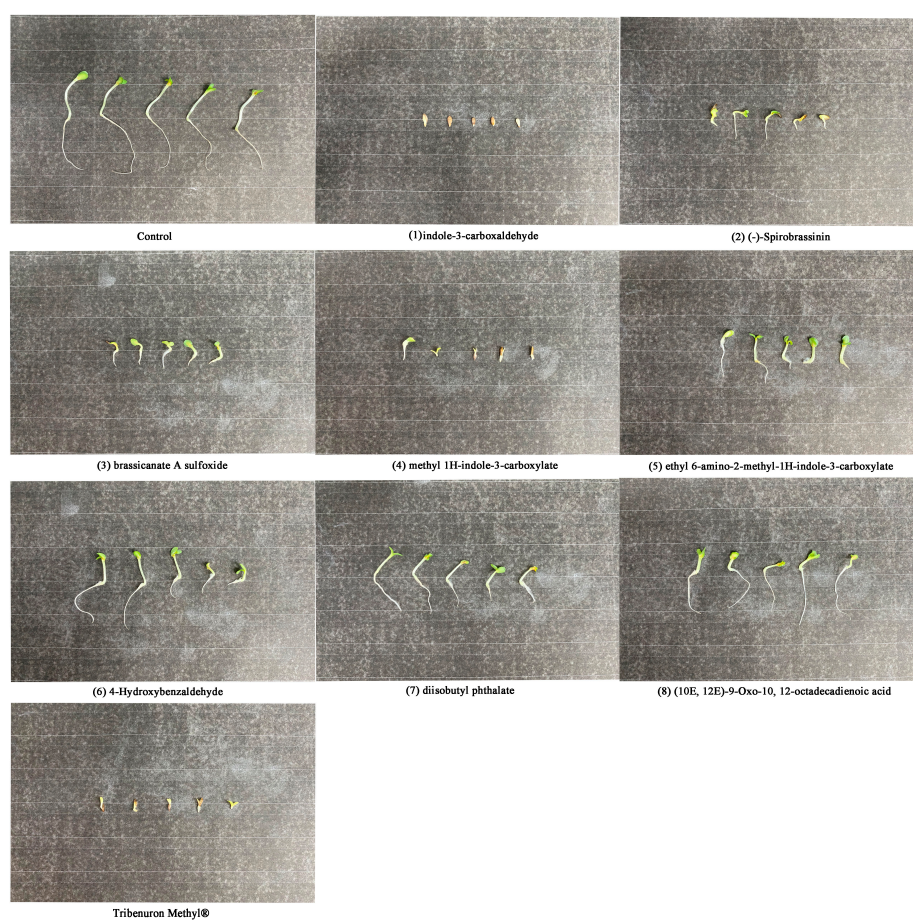

**Figure S2.** The effects of compounds from *B. oleracea* L. (1-8) and Tribenuron Methyl® on *L. sativa* Linn. seedling growth.

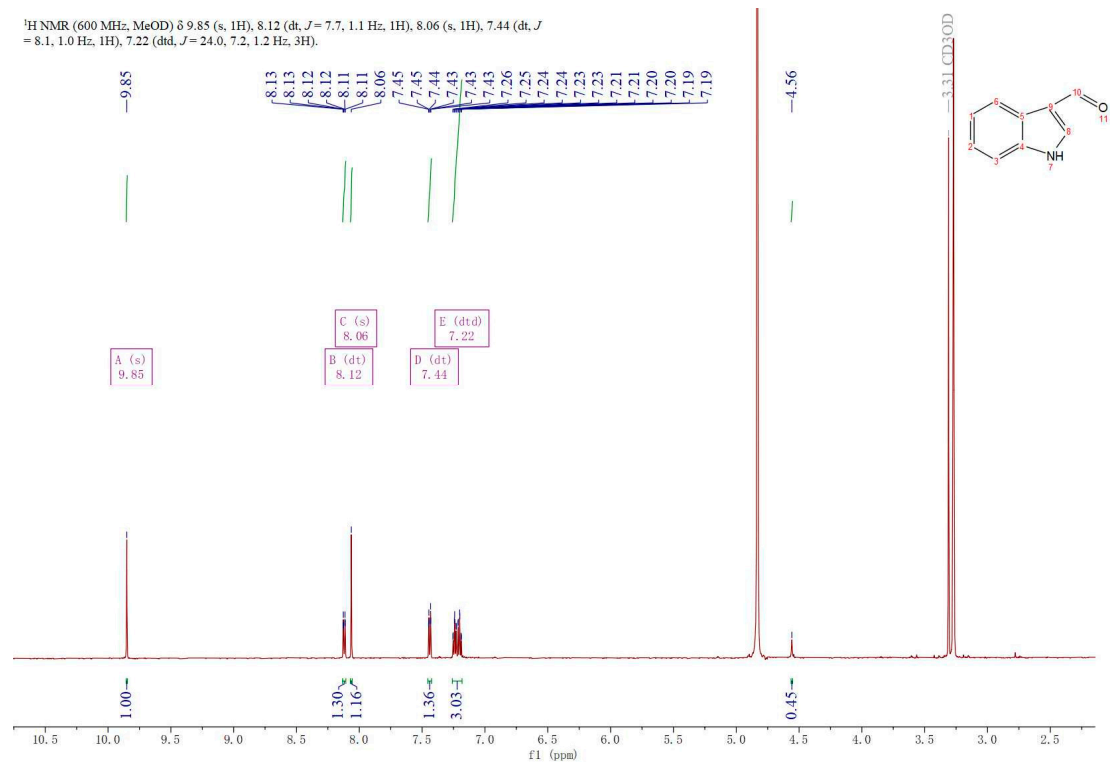

**Figure S3.** <sup>1</sup>H NMR of compound 1

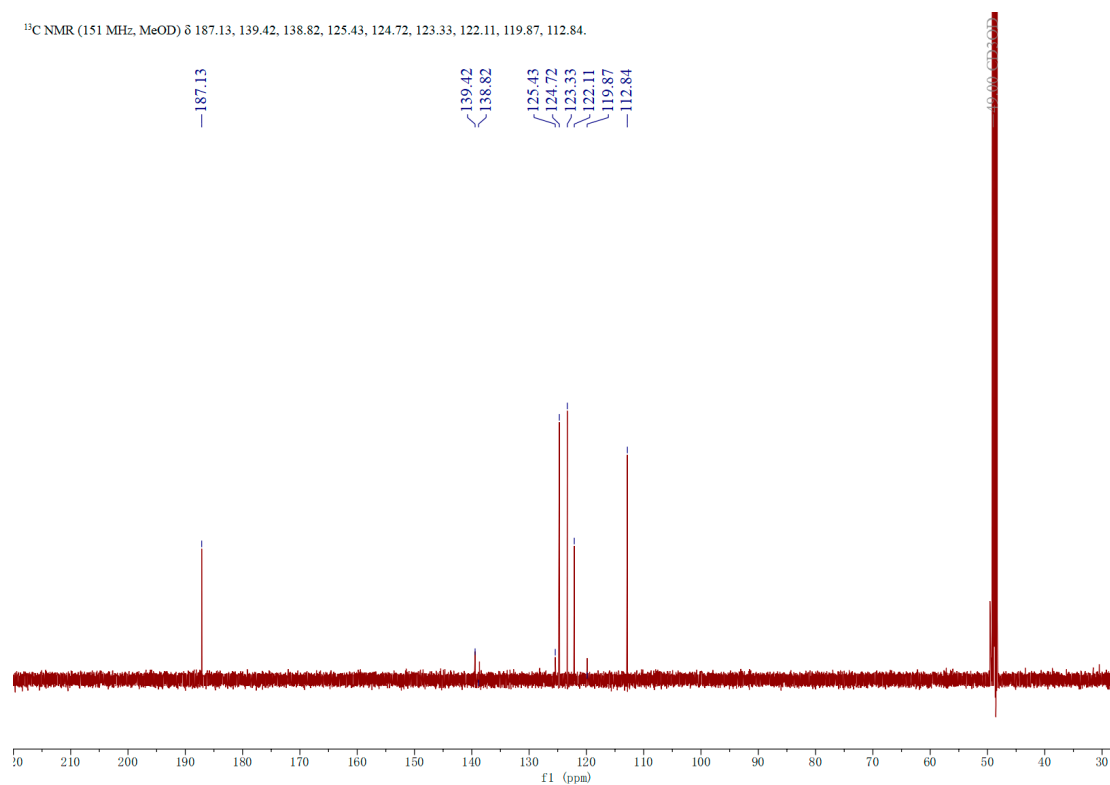

**Figure S4.** <sup>13</sup>C NMR of compound 1

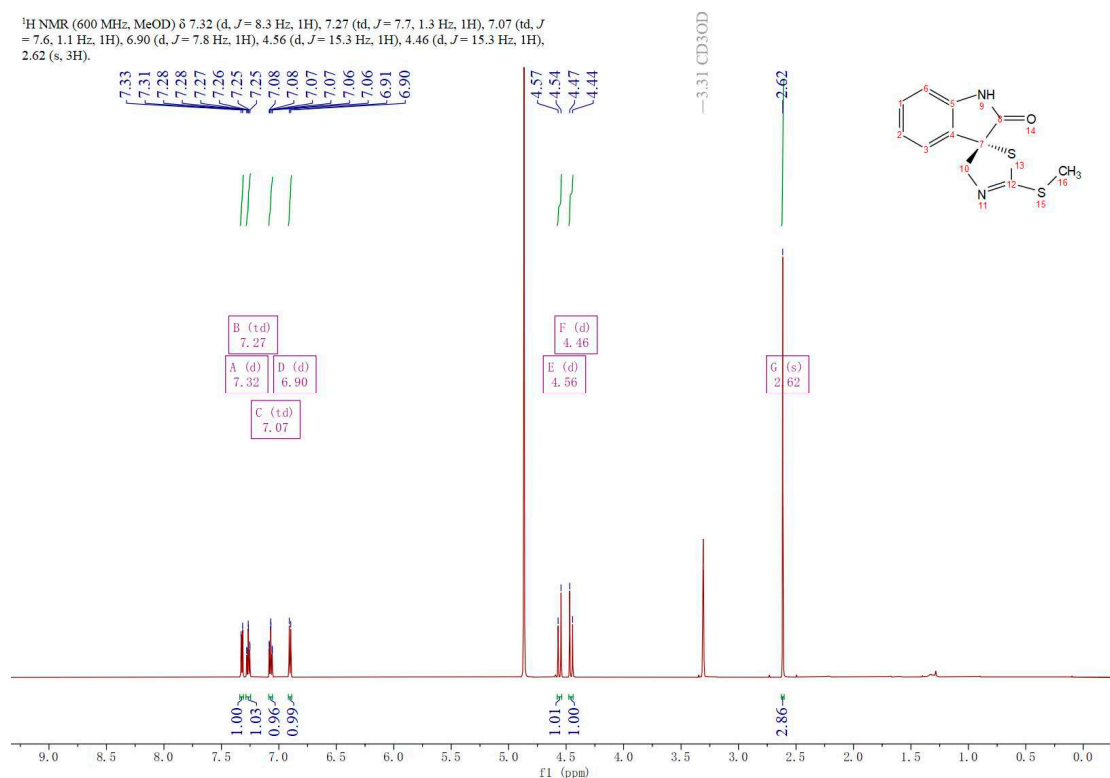

**Figure S5.**  $^1\text{H}$  NMR of compound 2

$^{13}\text{C}$  NMR (600 MHz, MeOD)  $\delta$  179.56, 166.37, 141.91, 132.00, 130.77, 125.09, 124.25, 111.26, 75.40, 65.75, 15.56.

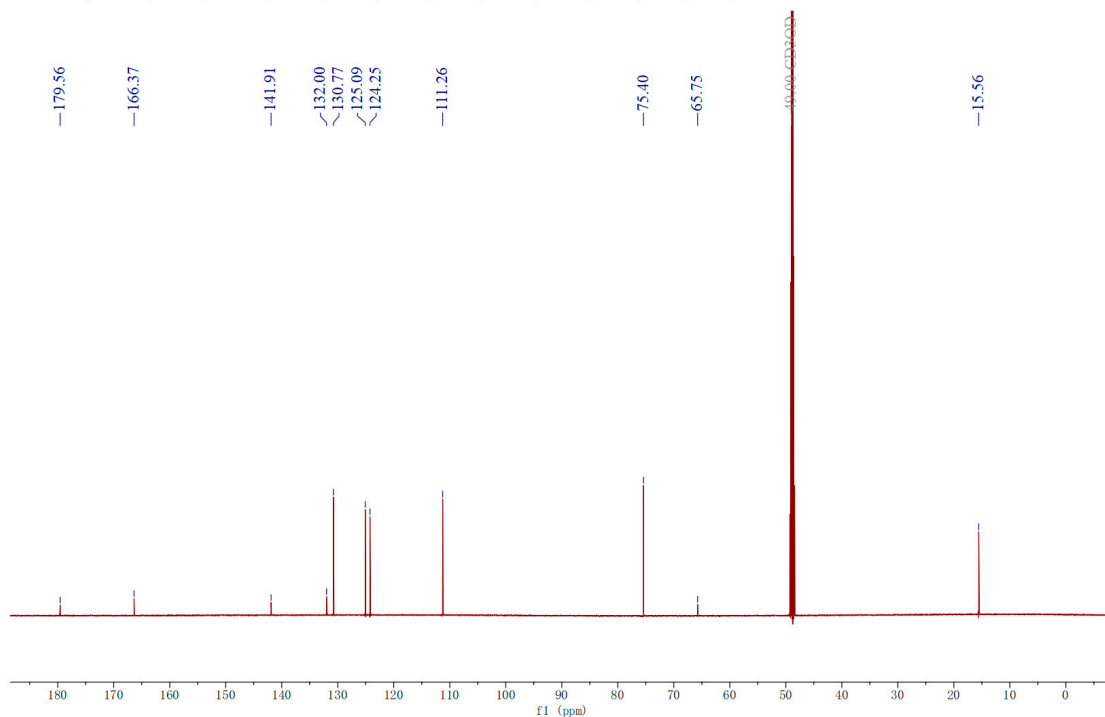

**Figure S6.**  $^{13}\text{C}$  NMR of compound 2



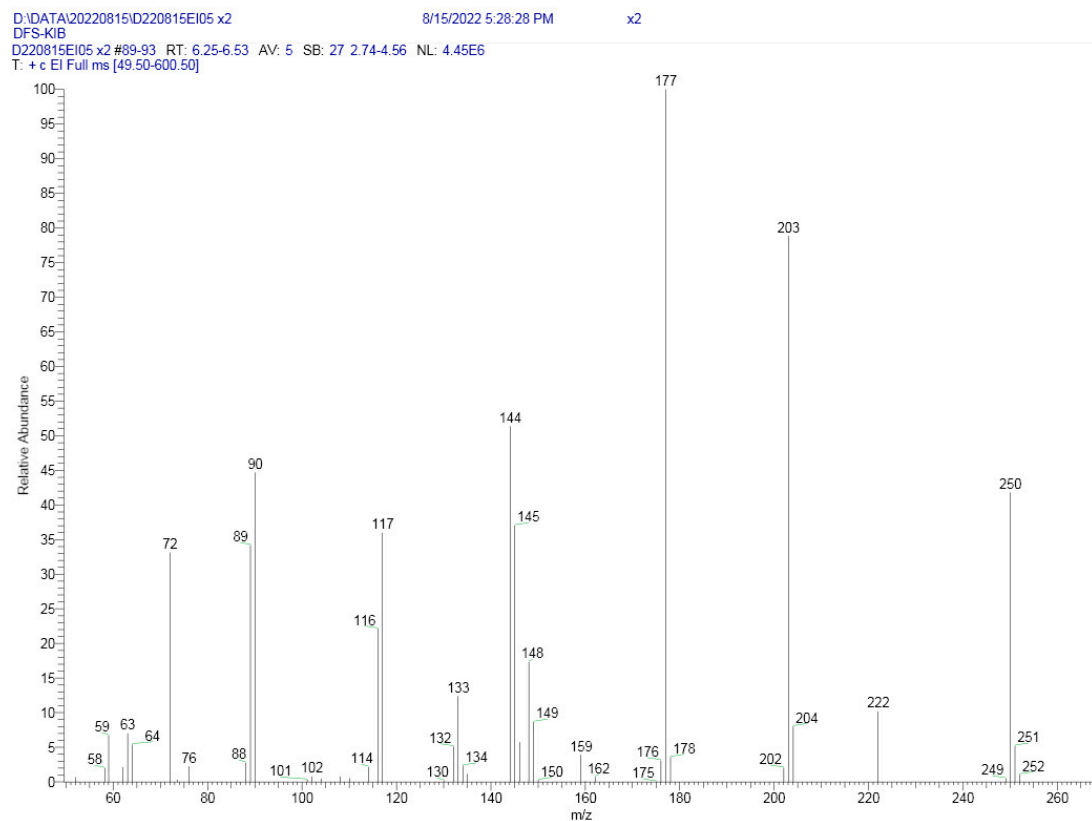

Figure S7. EI-MS of compound 2

#### Rudolph Research Analytical

This sample was measured on an Autopol VI, Serial #91058  
 Manufactured by Rudolph Research Analytical, Hackettstown, NJ, USA.

Measurement Date : Tuesday, 16-AUG-2022

Set Temperature : 25.0

Time Delay : Disabled

Delay between Measurement : Disabled

| n    | Average   | Std.Dev.    | % RSD  | Maximum | Minimum |        |        |              |       |  |
|------|-----------|-------------|--------|---------|---------|--------|--------|--------------|-------|--|
| 5    | -68.42    | 0.35        | -0.51  | -67.92  | -68.75  |        |        |              |       |  |
| S.No | Sample ID | Time        | Result | Scale   | OR °Arc | WLG.nm | Lg.mm  | Conc.g/100ml | Temp. |  |
| 1    | X2        | 06:39:24 PM | -68.75 | SR      | -0.330  | 589    | 100.00 | 0.480        | 24.9  |  |
| 2    | X2        | 06:39:30 PM | -68.75 | SR      | -0.330  | 589    | 100.00 | 0.480        | 24.9  |  |
| 3    | X2        | 06:39:36 PM | -68.33 | SR      | -0.328  | 589    | 100.00 | 0.480        | 24.9  |  |
| 4    | X2        | 06:39:42 PM | -68.33 | SR      | -0.328  | 589    | 100.00 | 0.480        | 24.9  |  |
| 5    | X2        | 06:39:49 PM | -67.92 | SR      | -0.326  | 589    | 100.00 | 0.480        | 24.9  |  |

Figure S8. specific rotation of compound 2

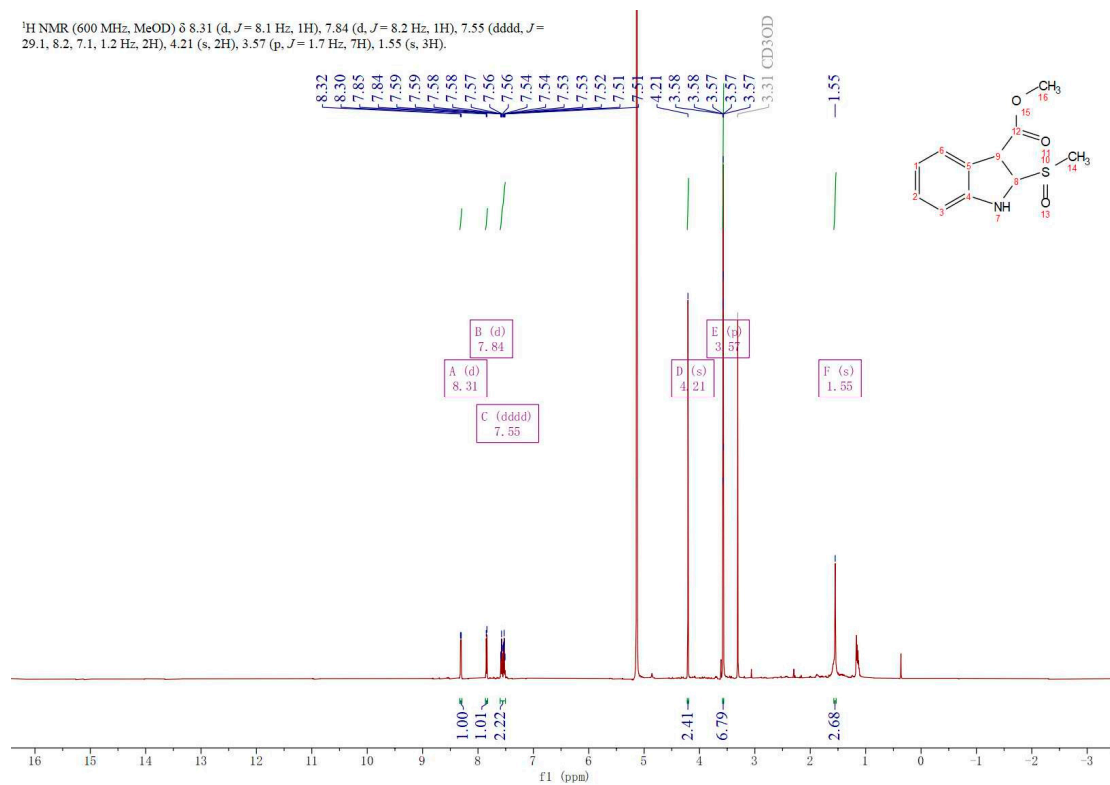

**Figure S9.** <sup>1</sup>H NMR of compound 3

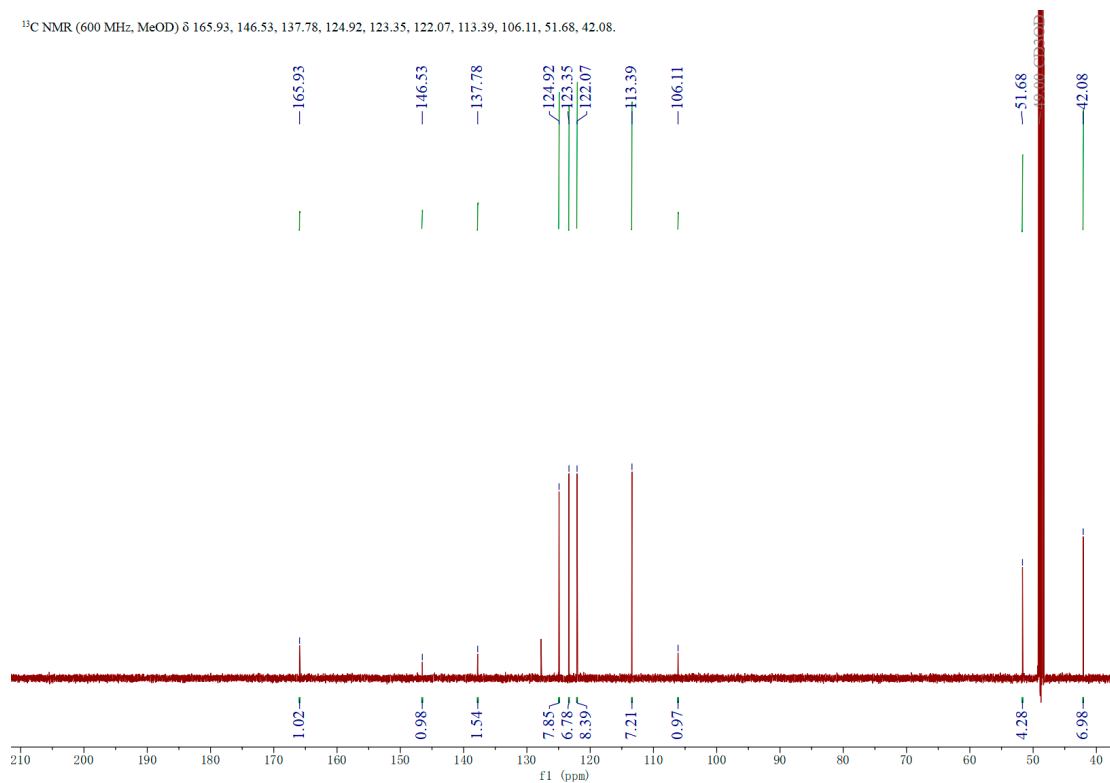

**Figure S10.** <sup>13</sup>C NMR of compound 3

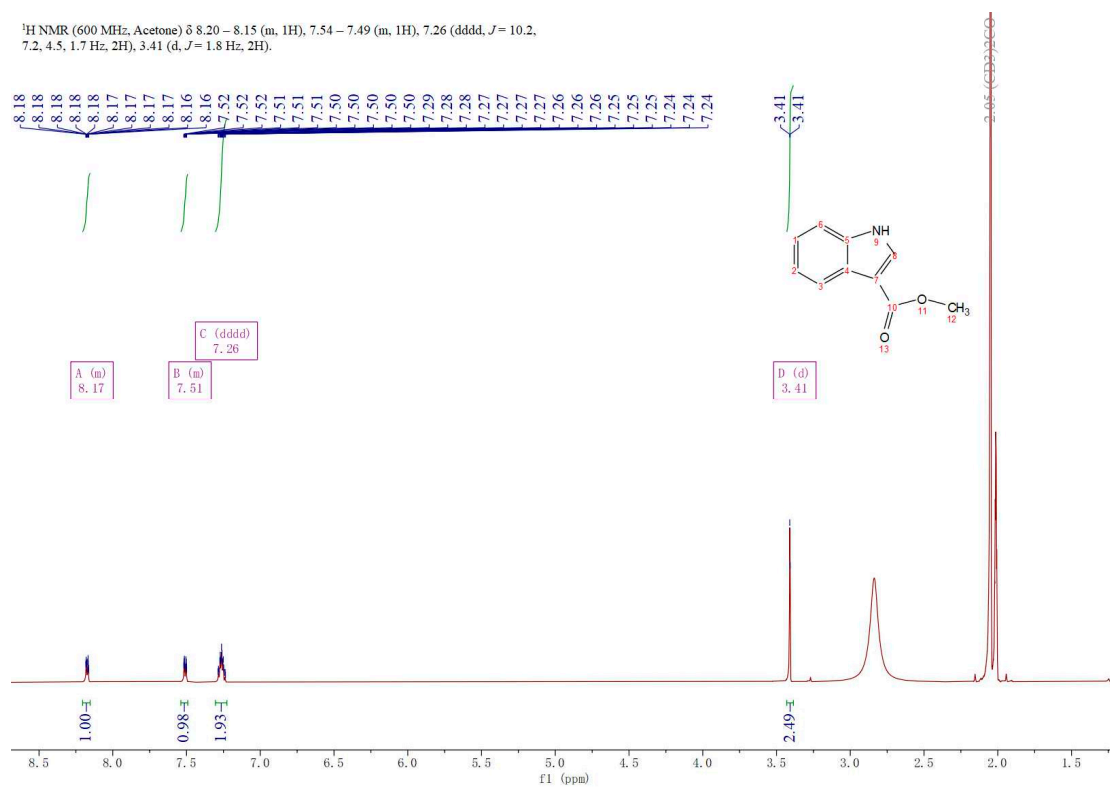

Figure S11. <sup>1</sup>H NMR of compound 4

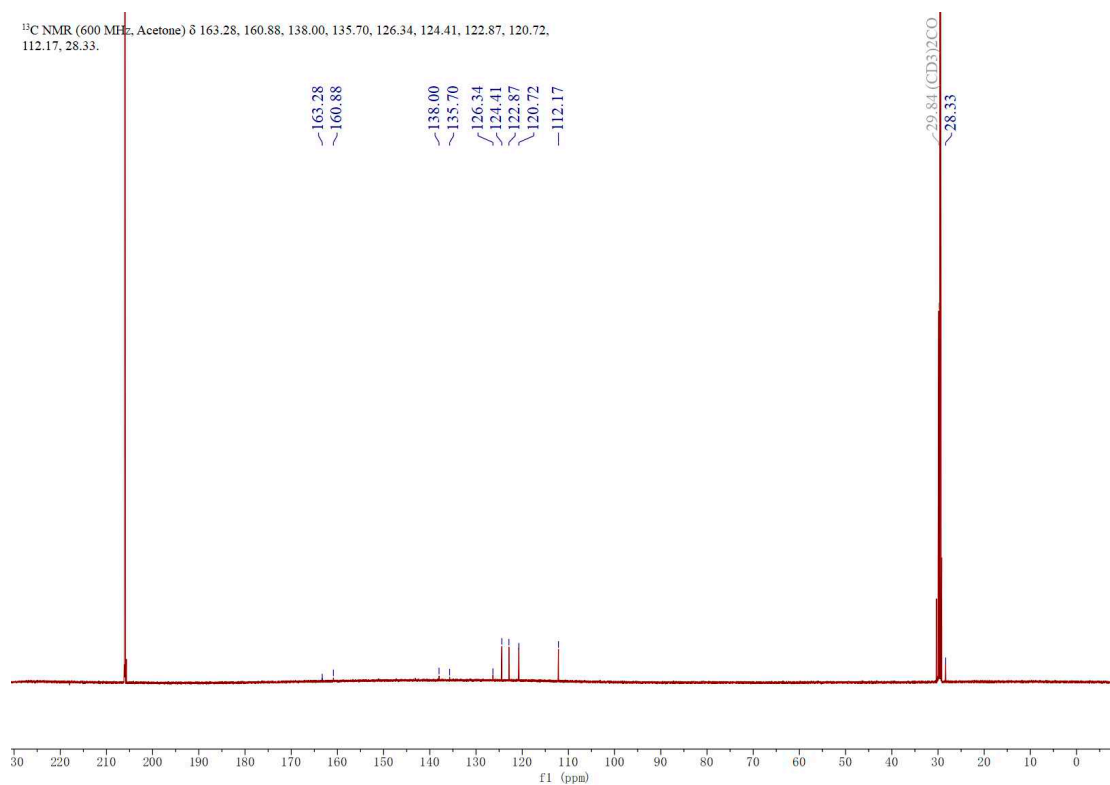

Figure S12. <sup>13</sup>C NMR of compound 4

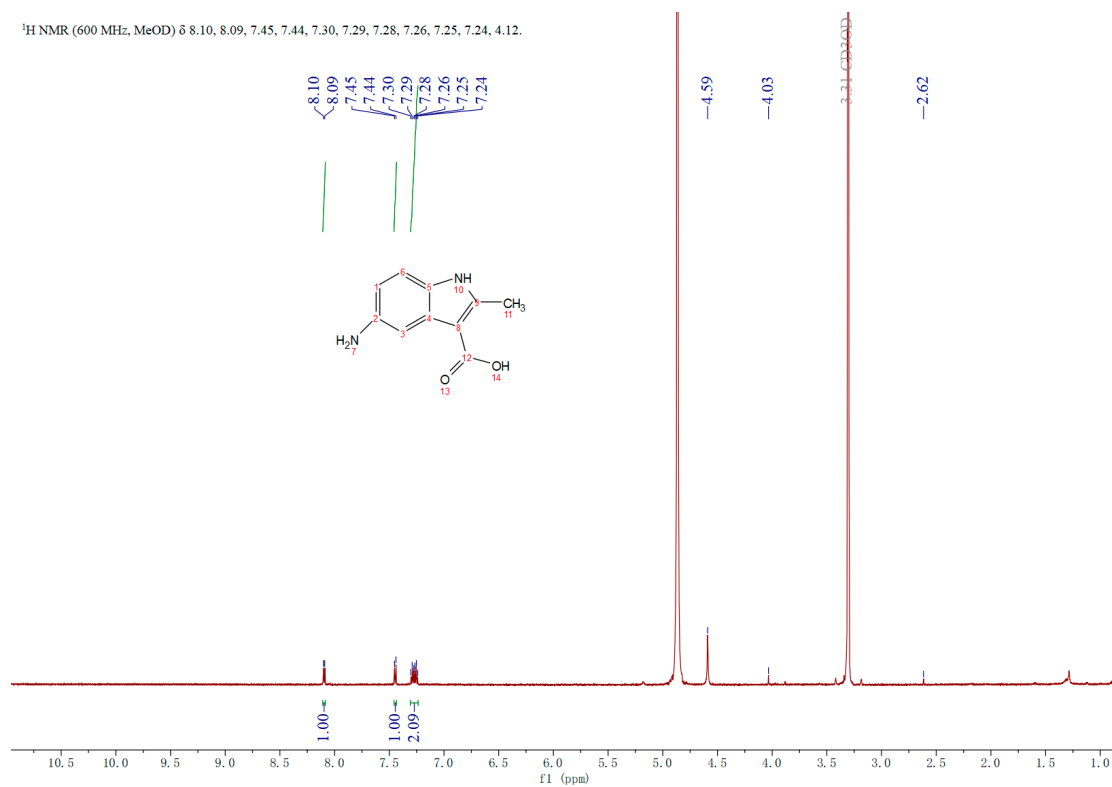

**Figure S13.**  $^1\text{H}$  NMR of compound 5

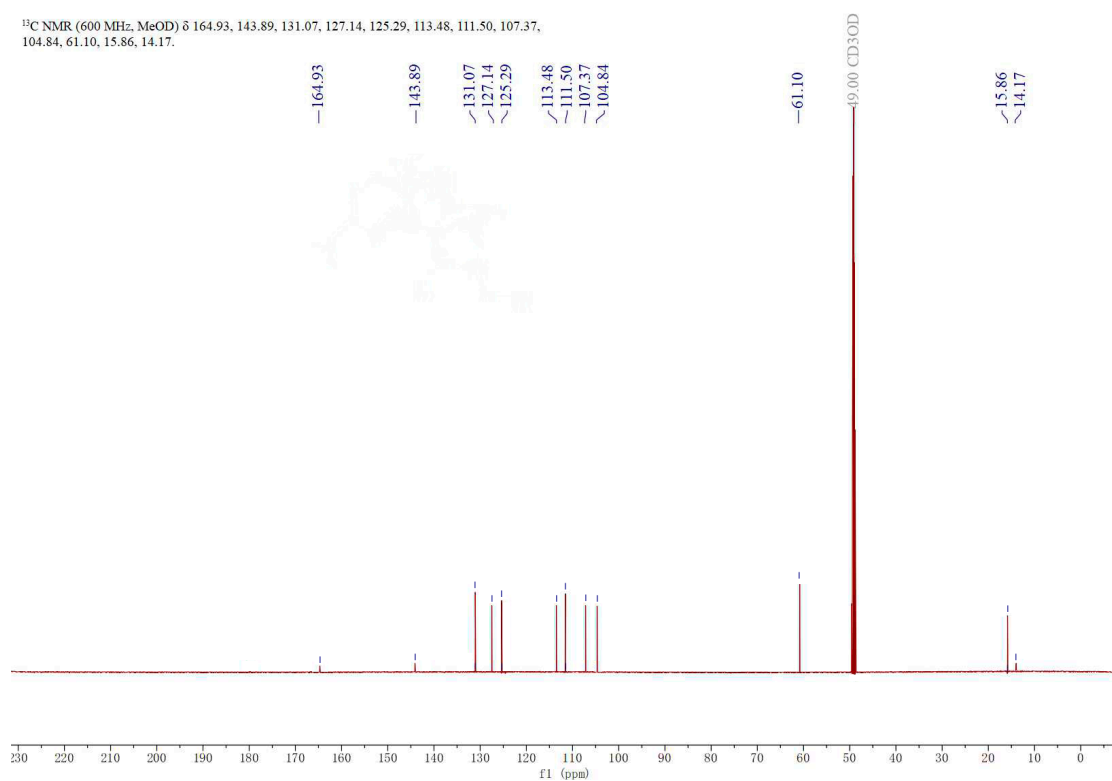

**Figure S14.**  $^{13}\text{C}$  NMR of compound 5



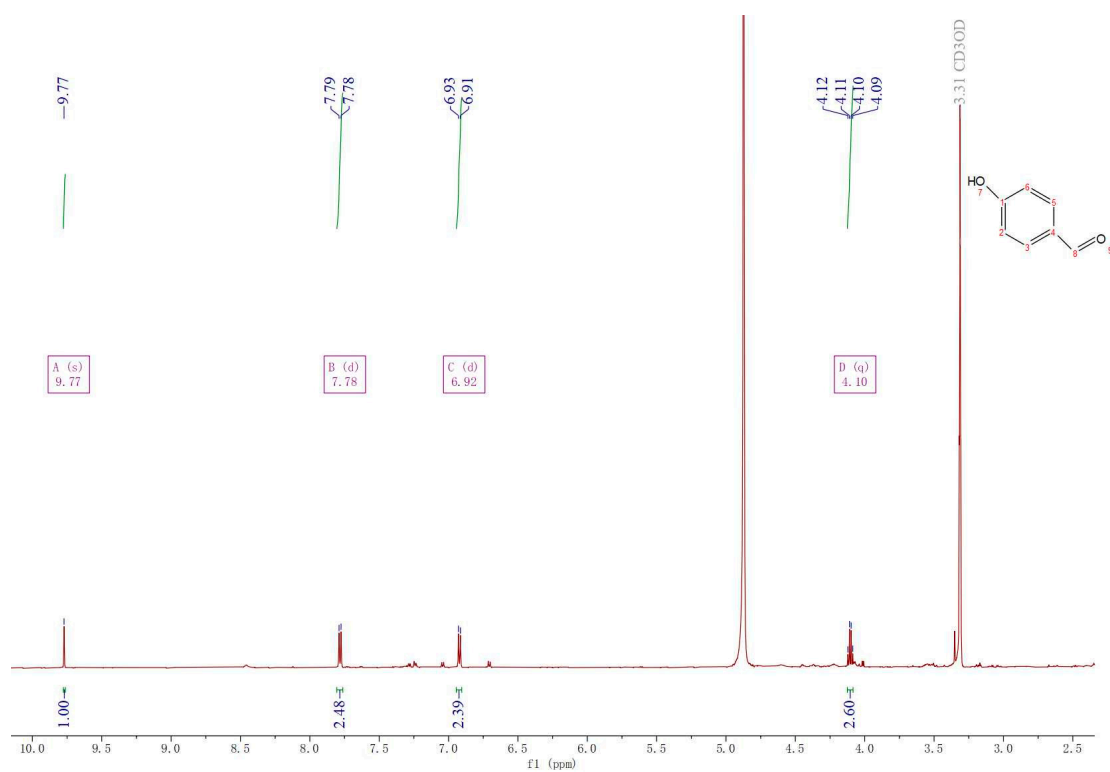

Figure S15. <sup>1</sup>H NMR of compound 6

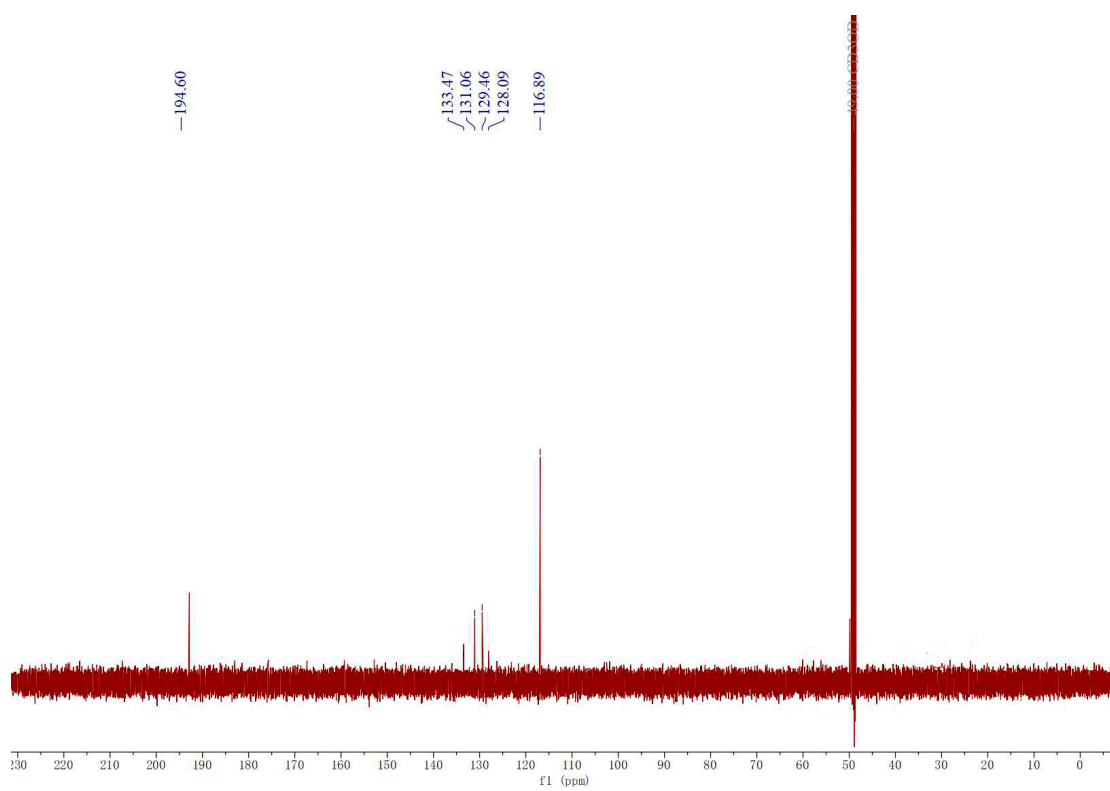

Figure S16. <sup>13</sup>C NMR of compound 6

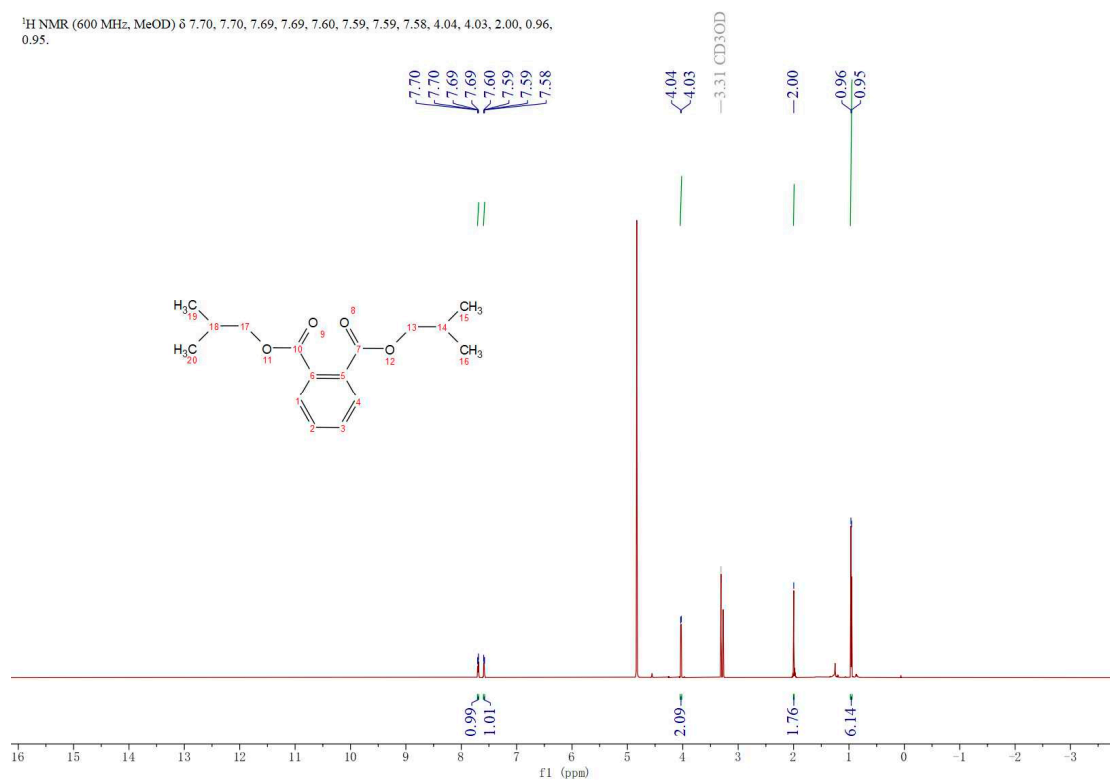

**Figure S17.** <sup>1</sup>H NMR of compound 7

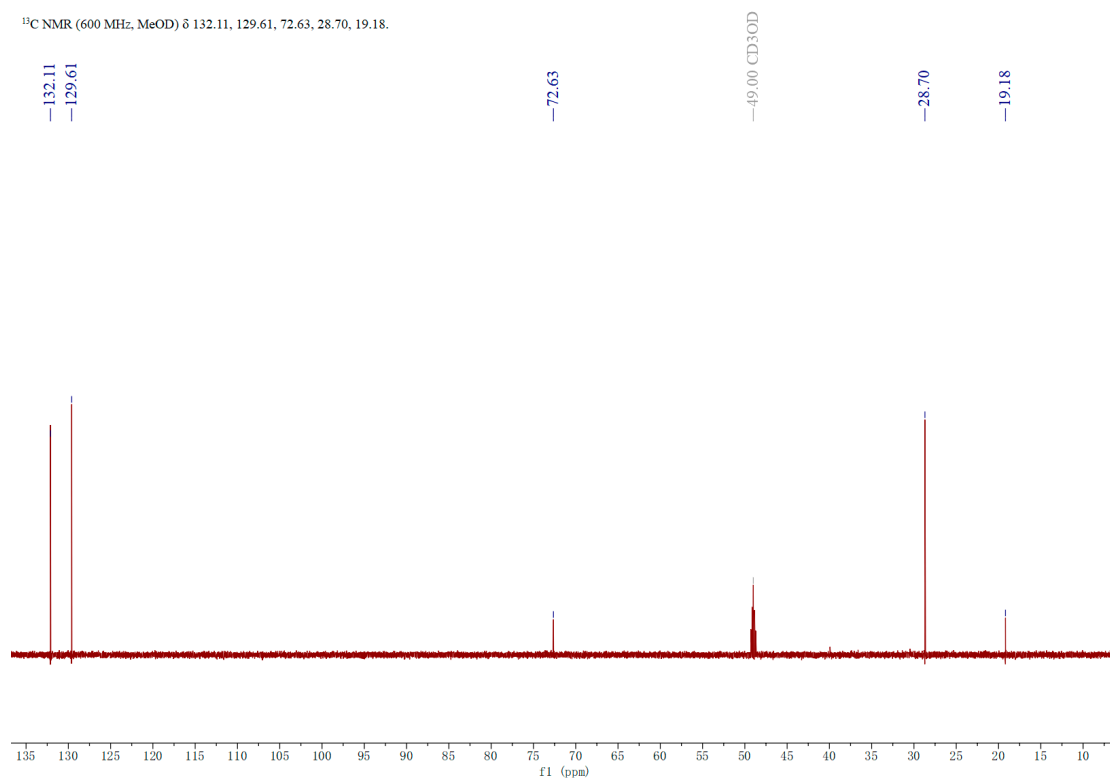

**Figure S18.** <sup>13</sup>C NMR of compound 7

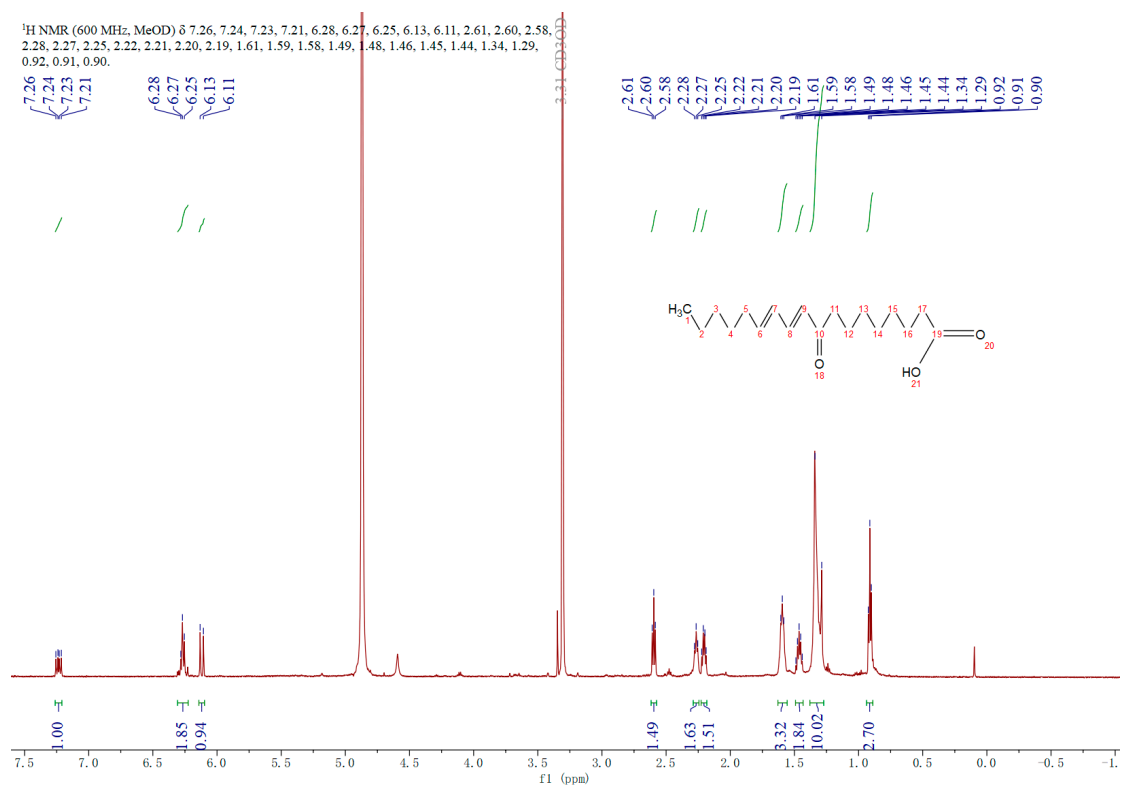

**Figure S19.** <sup>1</sup>H NMR of compound 8

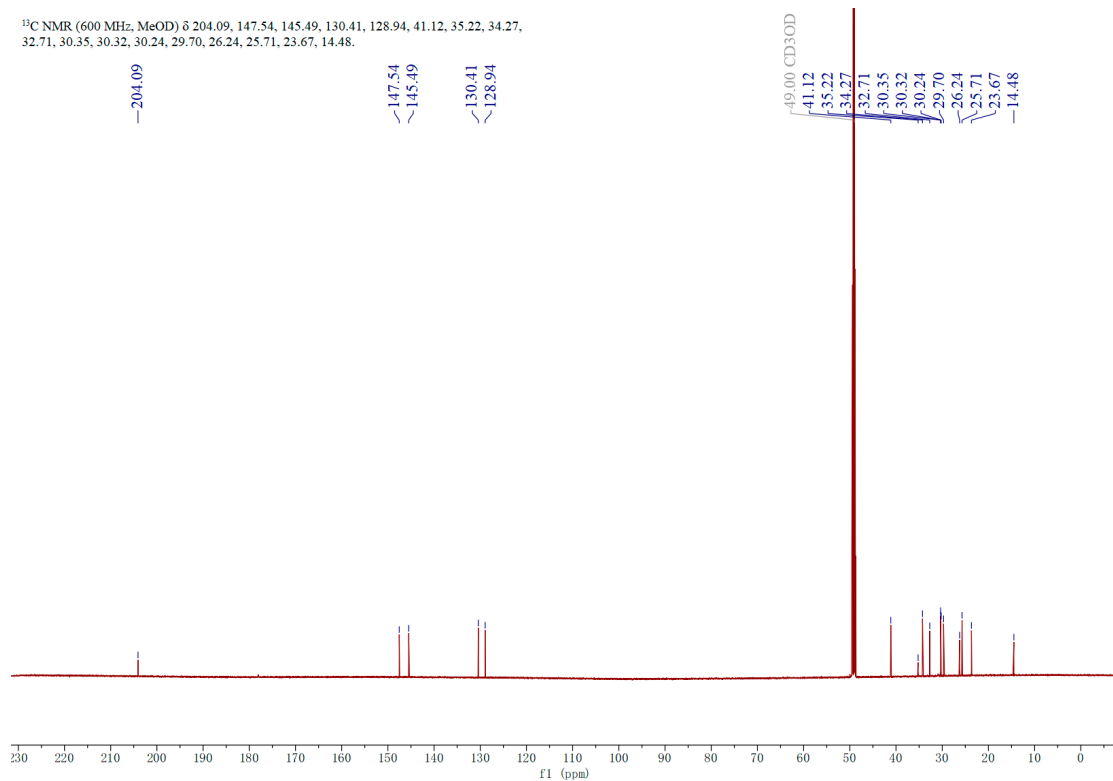

**Figure S20.** <sup>13</sup>C NMR of compound 8

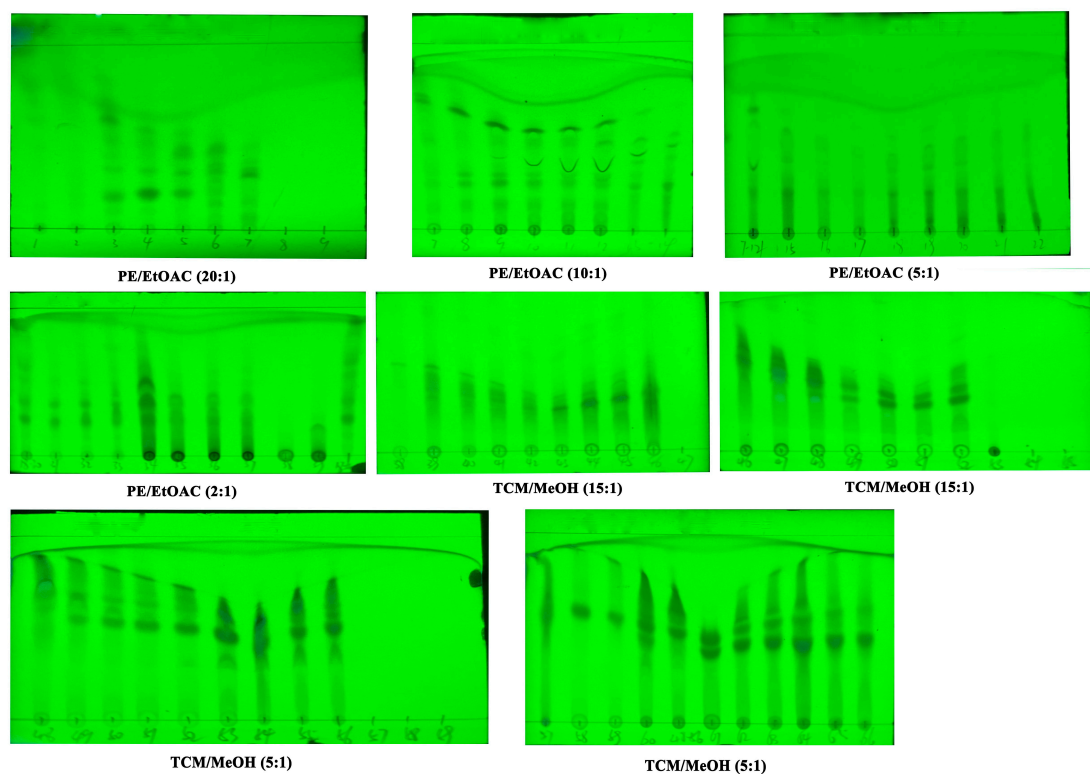

Figure S21. Thin Layer Chromatography (TLC) chromatogram of fractions

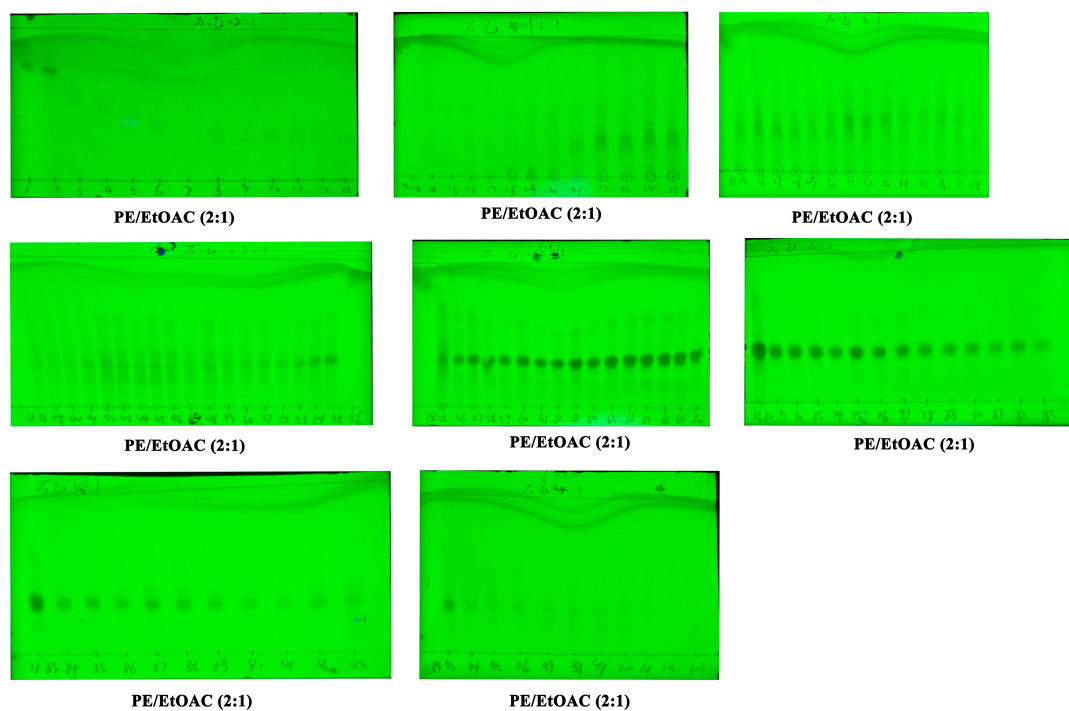

Figure S21. Thin Layer Chromatography (TLC) chromatogram of subfractions
